# Supplementary material
Source: publisher figshare collection journal article supplement (https://acs.figshare.com/ndownloader/files/14621471)
Supplement: Supplementary file 1 [file 14621471]

# **Biodegradable Poly(ester-*co*-acrylate) with Antifoulant Pendant Groups for Marine Anti-biofouling**

Guoxiong Dai, Qingyi Xie, Chunfeng Ma\*, Guangzhao Zhang

*Faculty of Materials Science and Engineering, South China University of Technology,  
Guangzhou 510640, P. R. China*

\* To whom correspondence should be addressed: [msmcf@scut.edu.cn](mailto:msmcf@scut.edu.cn)

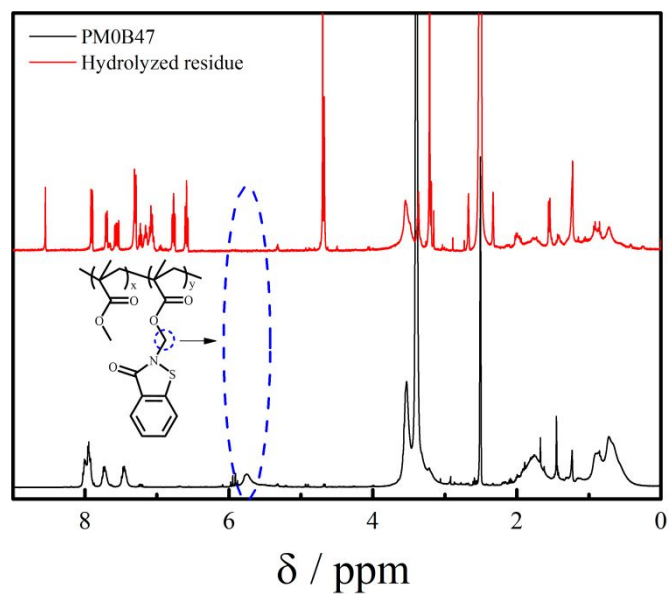

**Figure S1.**  $^1\text{H}$ -NMR spectra of the PM0B47 and the hydrolyzed residue in  $\text{DMSO-d}_6$ .

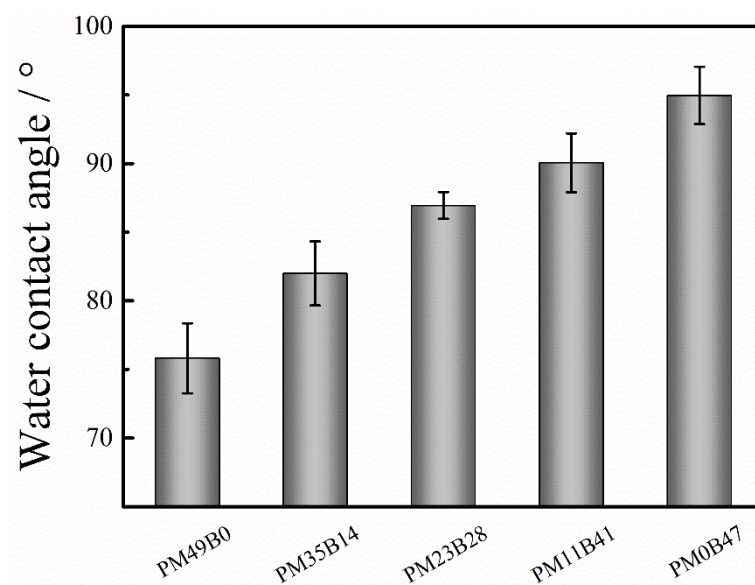

**Figure S2.** Water contact angle of PMxBy coatings at 25 °C.

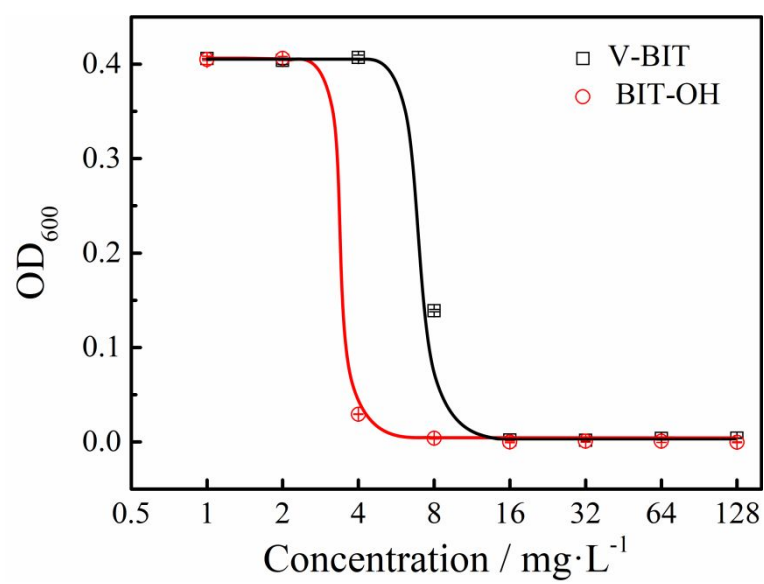

**Figure S3.** OD<sub>600</sub> of *Pseudomonas* sp. suspension after cultured with different concentration of V-BIT or BIT-OH for 24 hours.
